# Supplementary material for: Alkaloid from Geissospermum sericeum Benth. & Hook.f. ex Miers (Apocynaceae) Induce Apoptosis by Caspase Pathway in Human Gastric Cancer Cells
Source: MDPI journal article supplement (doi:10.3390/ph16050765), 2023-05-18

**Figure S1.**  $^1\text{H}$  NMR spectrum of compound 1 (300 MHz, MeOD)

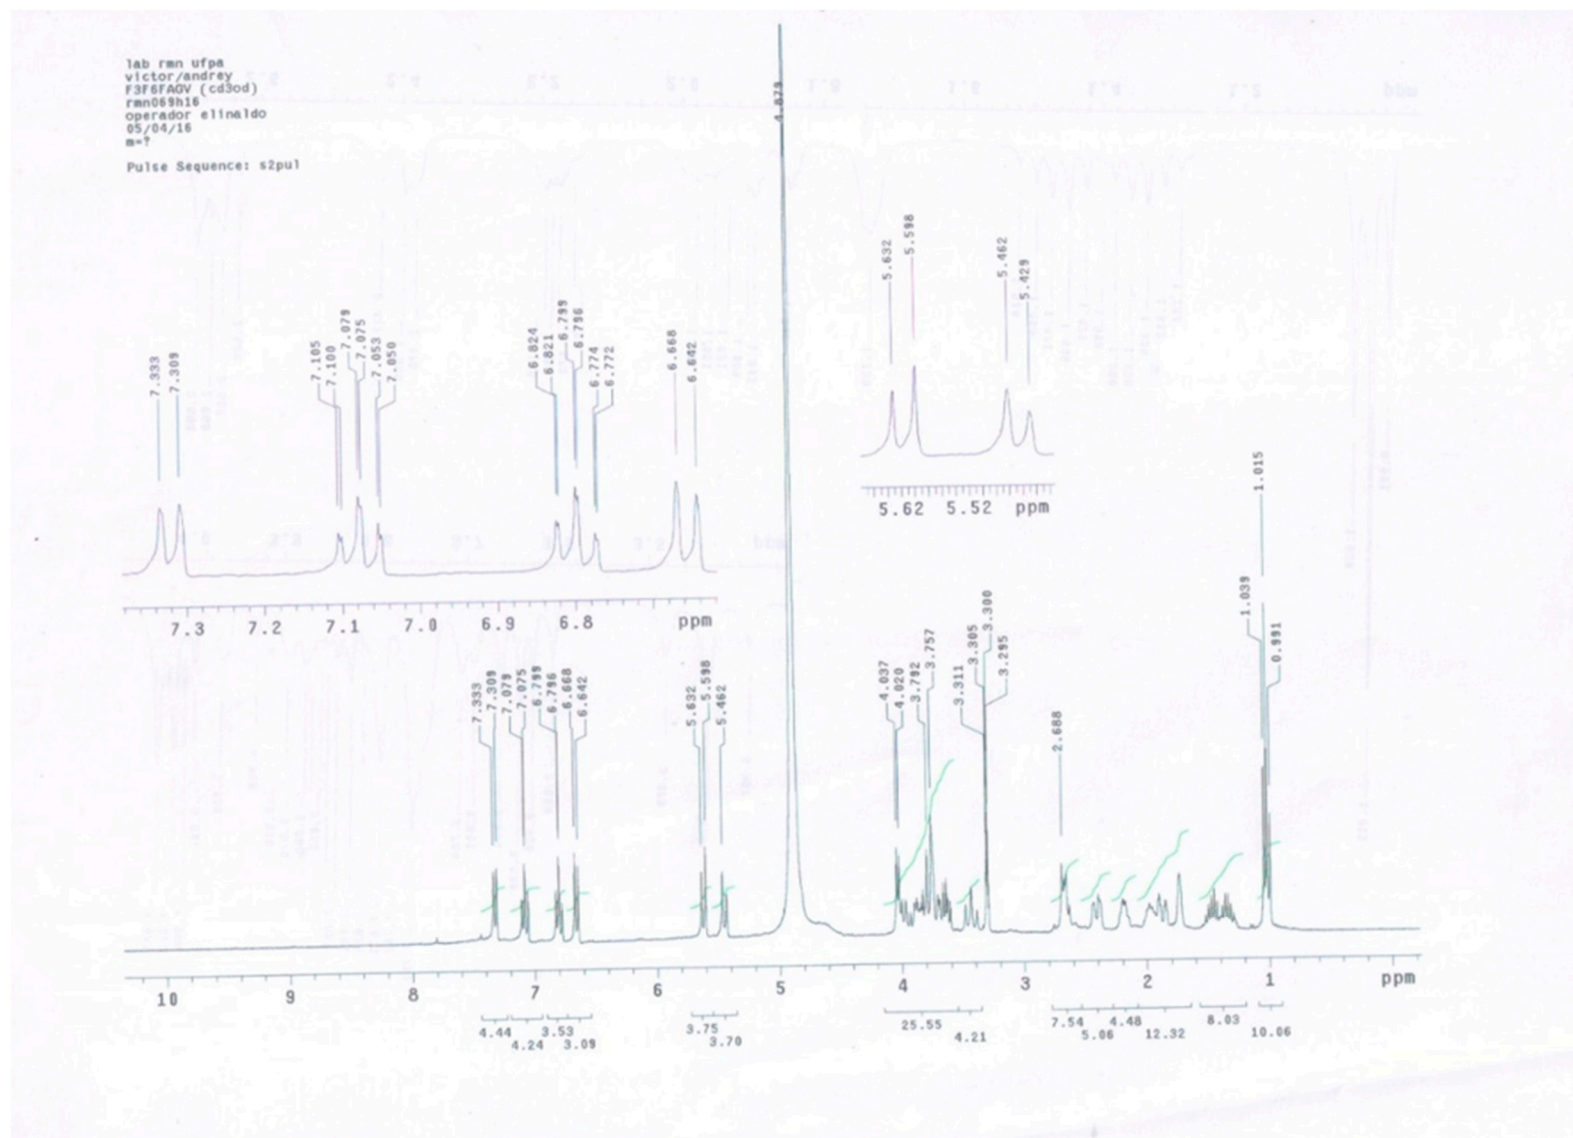

**Figure S2.**  $^{13}\text{C}$  NMR spectrum of compound 1 (75 MHz, MeOD)

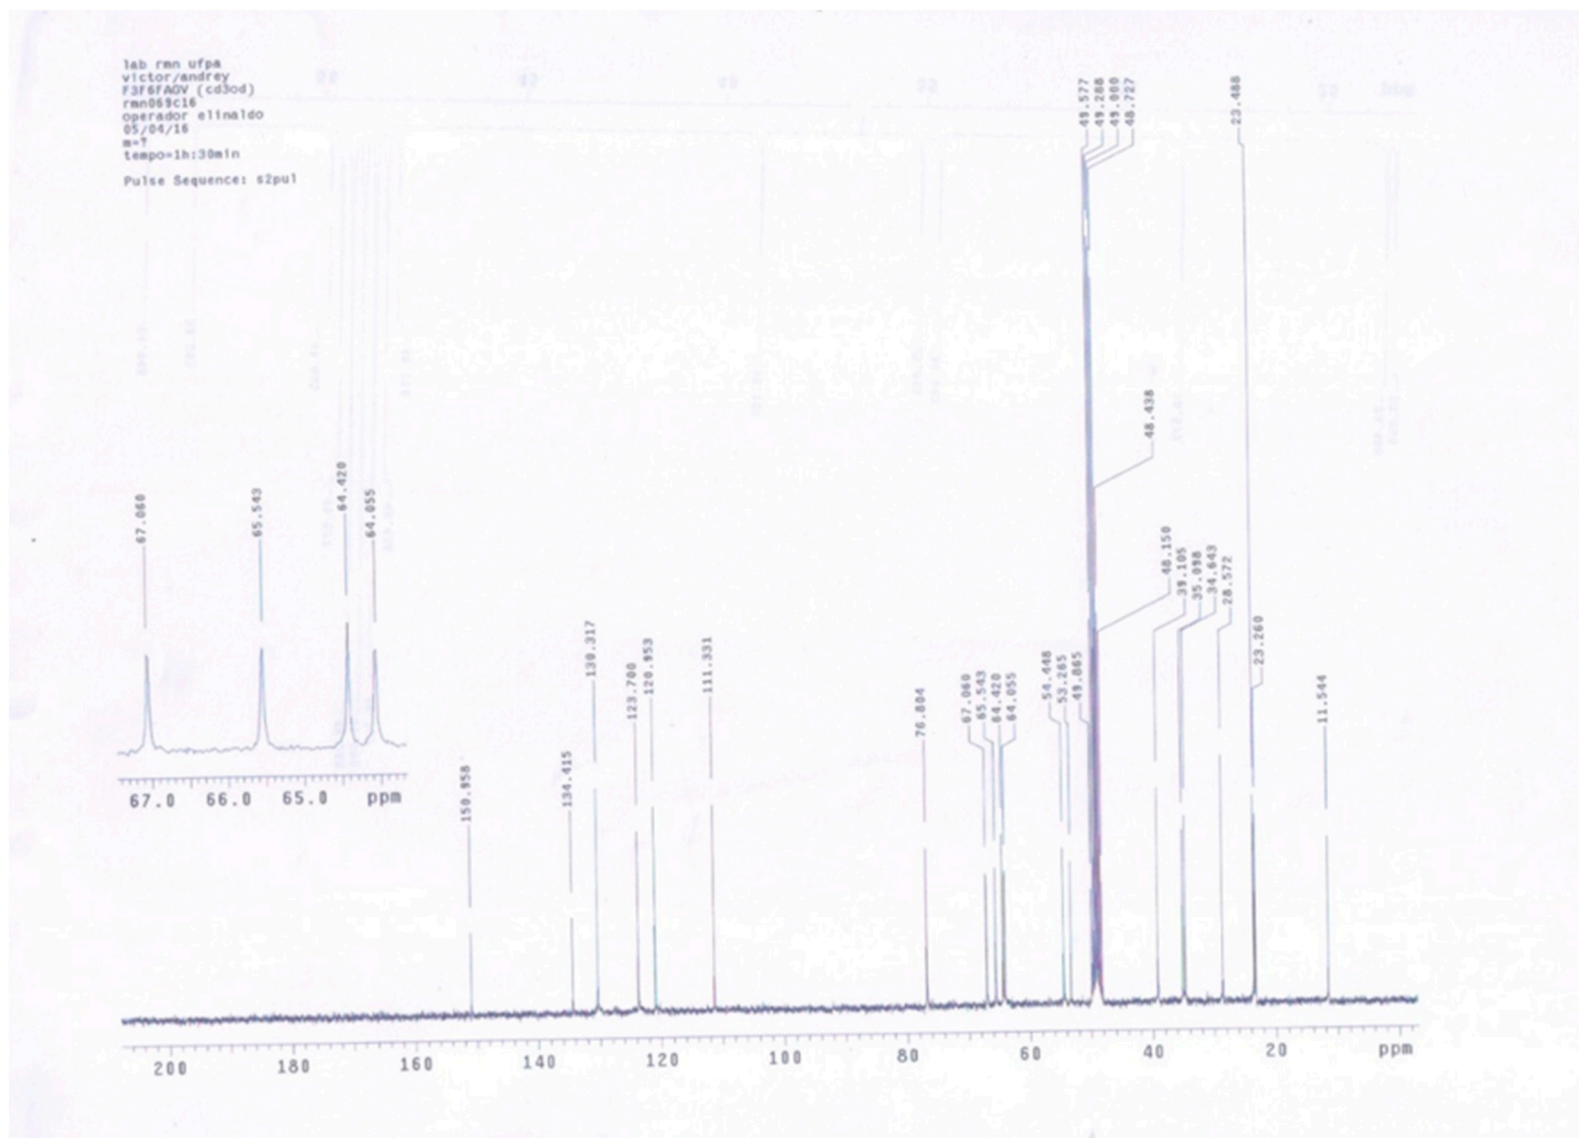

**Figure S3.** Full Scan MS spectrum of compound 1 ESI(+)

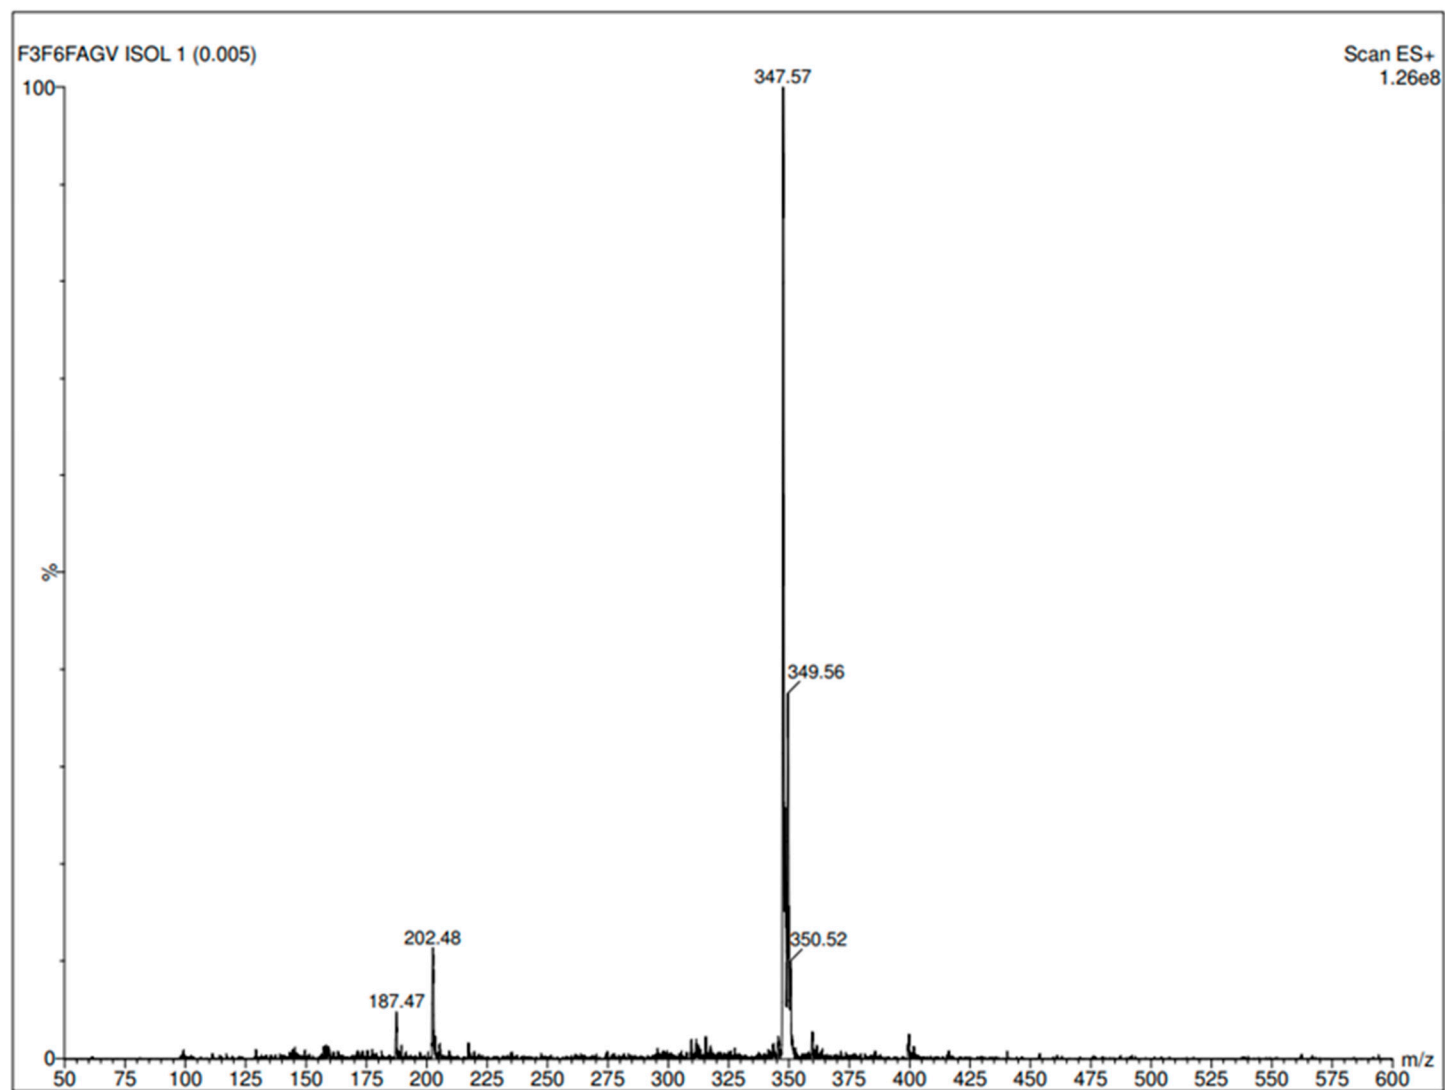

Supplement: s1 [file s1]
